# Supplementary material for: Temperament in Domestic Cats: A Review of Proximate Mechanisms, Methods of Assessment, Its Effects on Human—Cat Relationships, and One Welfare
Source: PubMed Central journal article supplement (PMC7552130; doi:10.3390/ani10091516), 2020-08-27
Supplement: animals-10-01516-s001.pdf [file animals-10-01516-s001.pdf]

# Supplementary Files: Temperament in Domestic Cats: A Review of Proximate Mechanisms, Methods of Assessment, its Effects on Human – Cat Relationships, and One Welfare

Isadora de Castro Travnik <sup>1,2</sup>, Daiana de Souza Machado <sup>1,2</sup>, Luana da Silva Gonçalves <sup>1</sup>, Maria Camila Ceballos <sup>3</sup> and Aline Cristina Sant’Anna <sup>1,\*</sup>

**Table S1.** Adjectives used in questionnaires for the rating assessment of cats’ temperament

| References                    | Feaver et al. [34] | McDowell et al. [64] | Litchfield et al. [9] | Ha & Ha [19] | Bennet et al. [94] | Gosling & Bonnenburg [89] | Lee et al. [92] | Zeigler-Hill & Hightfill [93] | Gartner & Powell [38] | Delgado et al. [76] | Salonen et al. [51] | Stella et al. [116] | Arhori et al. [50] |
|-------------------------------|--------------------|----------------------|-----------------------|--------------|--------------------|---------------------------|-----------------|-------------------------------|-----------------------|---------------------|---------------------|---------------------|--------------------|
| Active                        | 1                  | 1                    | 1                     | 1            |                    |                           | 1               |                               | 1                     | 1                   |                     | 1                   | 1                  |
| Activity level                |                    |                      |                       |              |                    |                           |                 |                               |                       |                     | 1                   |                     |                    |
| Energetic                     |                    |                      |                       |              | 1                  | 1                         |                 |                               |                       |                     |                     |                     |                    |
| Agile                         | 1                  |                      |                       | 1            |                    |                           |                 |                               |                       |                     |                     |                     |                    |
| Cunning                       |                    |                      |                       |              |                    |                           |                 | 1                             |                       |                     |                     |                     |                    |
| Guick                         |                    |                      |                       |              | 1                  |                           |                 |                               |                       |                     |                     |                     |                    |
| Quiet                         |                    | 1                    |                       |              |                    | 1                         |                 |                               |                       |                     |                     | 1                   |                    |
| Calm                          |                    |                      | 1                     |              | 1                  |                           |                 |                               | 1                     | 1                   |                     | 1                   | 1                  |
| Relaxed                       |                    |                      |                       |              | 1                  | 1                         |                 |                               |                       |                     |                     |                     |                    |
| Peaceful                      |                    |                      |                       |              | 1                  |                           |                 |                               |                       |                     |                     |                     |                    |
| Confident                     |                    | 1                    |                       |              | 1                  |                           |                 |                               |                       |                     |                     |                     |                    |
| Trusting                      |                    |                      | 1                     |              |                    |                           |                 |                               | 1                     |                     |                     |                     |                    |
| Self-assured                  |                    |                      | 1                     |              |                    |                           |                 |                               | 1                     |                     |                     |                     |                    |
| Persevering                   |                    |                      | 1                     |              | 1                  |                           |                 |                               | 1                     |                     |                     |                     |                    |
| Persistent                    |                    |                      |                       |              | 1                  |                           |                 |                               |                       |                     |                     |                     |                    |
| Decisive                      |                    |                      | 1                     |              |                    |                           |                 |                               | 1                     |                     |                     |                     |                    |
| Curious                       | 1                  |                      | 1                     | 1            | 1                  |                           | 1               |                               | 1                     |                     |                     | 1                   | 1                  |
| Excitable                     | 1                  | 1                    | 1                     | 1            |                    |                           |                 |                               | 1                     |                     |                     |                     | 1                  |
| Inquisitive                   |                    |                      | 1                     |              |                    |                           |                 |                               |                       |                     |                     |                     | 1                  |
| Watchful                      | 1                  |                      |                       | 1            |                    |                           |                 |                               |                       |                     |                     |                     |                    |
| Vigilant                      |                    |                      | 1                     |              |                    |                           |                 |                               | 1                     |                     |                     |                     | 1                  |
| Attentive                     |                    |                      |                       |              |                    |                           |                 |                               |                       |                     |                     |                     | 1                  |
| Shy                           |                    |                      | 1                     |              |                    | 1                         |                 | 1                             |                       | 1                   |                     | 1                   |                    |
| Shyness towards novel objects |                    |                      |                       |              |                    |                           |                 |                               |                       |                     | 1                   |                     |                    |
| Shyness towards strangers     |                    |                      |                       |              |                    |                           |                 |                               |                       |                     | 1                   |                     |                    |
| Timid                         |                    |                      |                       |              | 1                  |                           | 1               | 1                             | 1                     |                     |                     |                     | 1                  |
| Timid with strangers          |                    |                      |                       |              |                    |                           |                 |                               |                       |                     |                     | 1                   |                    |
| Constrained                   |                    |                      | 1                     |              |                    |                           |                 |                               | 1                     |                     |                     |                     |                    |
| Submissive                    |                    |                      | 1                     |              |                    |                           |                 |                               | 1                     |                     |                     |                     |                    |
| Bold                          |                    |                      | 1                     |              |                    | 1                         |                 |                               |                       | 1                   |                     |                     |                    |
| Impulsive                     |                    |                      | 1                     |              |                    |                           |                 |                               | 1                     |                     |                     |                     | 1                  |
| Defiant                       |                    |                      | 1                     |              |                    |                           |                 |                               |                       |                     |                     |                     | 1                  |
| Unenvious                     |                    |                      |                       |              |                    | 1                         |                 |                               |                       |                     |                     |                     |                    |
| Playful                       | 1                  | 1                    | 1                     | 1            | 1                  |                           |                 |                               | 1                     |                     |                     |                     | 1                  |
| Playful with people           |                    |                      |                       |              |                    |                           |                 |                               |                       |                     |                     | 1                   |                    |
| Playful with toys             |                    |                      |                       |              |                    |                           |                 |                               |                       |                     |                     | 1                   |                    |

|                                               |   |   |   |   |   |   |   |   |
|-----------------------------------------------|---|---|---|---|---|---|---|---|
| Sociable with people                          | 1 |   | 1 |   |   |   |   |   |
| Social with familiar people                   |   |   |   |   |   |   |   | 1 |
| Social with strangers                         |   |   |   |   |   |   |   | 1 |
| Contact with people                           |   |   |   |   |   |   |   | 1 |
| Friendly                                      | 1 |   |   | 1 | 1 |   | 1 | 1 |
| Friendly towards people                       |   |   | 1 |   |   |   | 1 |   |
| Affectionate                                  | 1 | 1 |   |   |   |   | 1 | 1 |
| Friendly towards conspecifics                 |   |   |   |   |   |   | 1 |   |
| Friendly towards other cats                   |   |   | 1 |   |   |   |   |   |
| Sociable with cats                            | 1 |   | 1 |   |   |   |   |   |
| Sociable Likes attention but is not demanding |   |   |   |   | 1 |   |   | 1 |
| Solitary                                      | 1 | 1 | 1 |   |   |   | 1 |   |
| Antisocial                                    |   |   |   |   | 1 |   |   |   |
| Distant                                       |   |   |   |   | 1 |   |   |   |
| Withdrawn                                     |   |   |   | 1 |   |   |   |   |
| Aloof                                         |   |   |   |   |   |   | 1 |   |
| Jealous                                       |   | 1 |   | 1 |   |   | 1 |   |
| Envious                                       |   |   |   | 1 |   |   |   |   |
| Stable                                        |   | 1 |   |   |   |   | 1 |   |
| Equable                                       |   |   | 1 |   |   |   |   |   |
| Equable with cats                             | 1 |   |   |   |   |   |   |   |
| Aggressive                                    | 1 | 1 | 1 | 1 |   | 1 |   | 1 |
| Aggressive towards people                     |   |   | 1 |   |   |   | 1 |   |
| Hostile towards people                        | 1 |   | 1 |   |   |   |   |   |
| Hostile towards cats                          | 1 |   | 1 |   |   |   |   |   |
| Aggressive towards conspecifics               |   |   |   |   |   |   | 1 |   |
| Aggressive towards other cats                 |   |   | 1 |   |   |   |   |   |
| Aggression towards strangers                  |   |   |   |   |   |   |   | 1 |
| Aggression towards family members             |   |   |   |   |   |   |   | 1 |
| Aggression towards cats                       |   |   |   |   |   |   |   | 1 |
| Tense                                         | 1 | 1 | 1 |   |   |   | 1 |   |
| Anxious                                       |   | 1 |   |   | 1 |   | 1 | 1 |
| Nervous                                       |   |   |   | 1 | 1 |   |   | 1 |
| Irritable                                     |   | 1 |   |   |   |   |   | 1 |

|                                     |   |  |  |   |  |  |  |   |   |
|-------------------------------------|---|--|--|---|--|--|--|---|---|
| Fretful                             |   |  |  |   |  |  |  |   | 1 |
| Rude                                |   |  |  |   |  |  |  |   | 1 |
| Bad-tempered                        |   |  |  |   |  |  |  | 1 |   |
| Harsh                               |   |  |  |   |  |  |  |   | 1 |
| Cruel                               |   |  |  |   |  |  |  |   | 1 |
| Ruthless                            |   |  |  |   |  |  |  |   | 1 |
| Bossy                               |   |  |  |   |  |  |  |   |   |
| Owner-evaluated behavioural problem |   |  |  |   |  |  |  |   | 1 |
| Fearful                             |   |  |  |   |  |  |  |   | 1 |
| Fearful of cats                     | 1 |  |  | 1 |  |  |  |   |   |
| Fearful of other cats               |   |  |  | 1 |  |  |  |   |   |
| Fearful of conspecifics             |   |  |  |   |  |  |  |   | 1 |
| Fearful of people                   | 1 |  |  | 1 |  |  |  |   | 1 |
| Vocal                               | 1 |  |  | 1 |  |  |  |   | 1 |
| Verbal                              |   |  |  |   |  |  |  |   | 1 |
| Talkative                           |   |  |  |   |  |  |  |   | 1 |
| Untalkative                         |   |  |  |   |  |  |  |   | 1 |
| Voracious                           | 1 |  |  | 1 |  |  |  |   |   |
| Cooperative                         |   |  |  | 1 |  |  |  |   | 1 |
| Obedient                            |   |  |  | 1 |  |  |  |   | 1 |
| Trainable                           |   |  |  |   |  |  |  |   | 1 |
| Smart                               |   |  |  | 1 |  |  |  |   | 1 |
| Intellectual                        |   |  |  |   |  |  |  |   | 1 |
| Clever                              |   |  |  |   |  |  |  |   | 1 |
| Intelligent                         |   |  |  | 1 |  |  |  |   |   |
| Unintellectual                      |   |  |  |   |  |  |  |   | 1 |
| Unintelligent                       |   |  |  |   |  |  |  |   | 1 |
| Independent                         | 1 |  |  | 1 |  |  |  |   | 1 |
| Individualistic                     | 1 |  |  |   |  |  |  |   | 1 |
| Excessive grooming                  |   |  |  |   |  |  |  |   | 1 |
| Clean                               | 1 |  |  |   |  |  |  |   |   |
| Wool sucking                        |   |  |  |   |  |  |  |   | 1 |
| Suspicious                          |   |  |  | 1 |  |  |  |   | 1 |
| Insecure                            |   |  |  | 1 |  |  |  |   | 1 |
| Cautious                            |   |  |  | 1 |  |  |  |   | 1 |
| Calculating                         |   |  |  |   |  |  |  |   | 1 |
| Apprehensive                        |   |  |  | 1 |  |  |  |   |   |
| Dominant                            |   |  |  | 1 |  |  |  |   | 1 |
| Bullying                            |   |  |  | 1 |  |  |  |   | 1 |
| Domineering                         |   |  |  | 1 |  |  |  |   |   |
| Territorial                         |   |  |  | 1 |  |  |  |   |   |
| Cool                                | 1 |  |  |   |  |  |  |   | 1 |
| Warm                                |   |  |  | 1 |  |  |  |   | 1 |
| Kind                                |   |  |  | 1 |  |  |  |   | 1 |
| Emotional                           |   |  |  |   |  |  |  |   | 1 |
| Charming                            |   |  |  | 1 |  |  |  |   |   |
| Protective                          |   |  |  |   |  |  |  |   | 1 |
| Gentle                              |   |  |  | 1 |  |  |  |   | 1 |
| Tender                              |   |  |  |   |  |  |  |   | 1 |
| Outgoing                            |   |  |  |   |  |  |  |   | 1 |
| Fairthful                           |   |  |  | 1 |  |  |  |   |   |

|                         |   |   |   |
|-------------------------|---|---|---|
| Sympathetic             |   | 1 |   |
| Boastless               |   |   | 1 |
| Extraverted             |   | 1 |   |
| Tolerant                |   |   | 1 |
| Undemanding             |   |   | 1 |
| Practical               |   | 1 |   |
| Prompt                  |   | 1 |   |
| Considerate             |   | 1 |   |
| Efficient               |   | 1 |   |
| Easy going              |   |   | 1 |
| Stubborn                |   |   | 1 |
| Unsympathetic           |   | 1 |   |
| Mischievous             |   | 1 | 1 |
| Intolerant              |   |   | 1 |
| Unkind                  |   | 1 |   |
| Touchy                  |   | 1 |   |
| Foolish                 |   | 1 |   |
| Proud                   |   | 1 |   |
| Stingy                  |   |   | 1 |
| Cold                    |   | 1 |   |
| Greedy                  | 1 |   |   |
| Needy                   |   | 1 |   |
| Needy, forces attention |   |   | 1 |
| Demanding               |   | 1 |   |
| Imaginative             |   | 1 |   |
| Inventive               | 1 |   | 1 |
| Creative                |   | 1 |   |
| Artistic                |   | 1 |   |
| Philosophical           |   | 1 |   |
| Aimless                 | 1 |   | 1 |
| Erratic                 | 1 |   | 1 |
| Eccentric               | 1 |   | 1 |
| Temperamental           |   | 1 |   |
| Moody                   | 1 | 1 | 1 |
| Systematic              |   | 1 |   |
| Organized               |   | 1 |   |
| Unsystematic            |   | 1 |   |
| Disorganized            |   | 1 |   |
| Unreactive              |   | 1 |   |
| Forceful                |   |   | 1 |
| Loud                    |   | 1 |   |
| Mellow                  |   |   | 1 |
| Clumsy                  | 1 | 1 |   |
| Careless                |   | 1 |   |
| Sloppy                  |   | 1 |   |
| Inefficient             |   | 1 |   |
| Reckless                | 1 |   | 1 |
| Serious                 |   | 1 |   |
| Gullible                |   | 1 |   |
| Confused                |   | 1 |   |
| Distractible            | 1 |   | 1 |
| Deliberate              | 1 |   | 1 |
| Quitting                | 1 |   | 1 |
| Predictable             | 1 |   | 1 |
| Deep                    |   | 1 |   |
| Bashful                 |   | 1 |   |
| Complex                 |   | 1 |   |
| Focused                 |   |   | 1 |

|              |    |    |    |    |    |    |    |    |    |    |    |    |    |
|--------------|----|----|----|----|----|----|----|----|----|----|----|----|----|
| Adaptable    |    |    |    |    |    |    |    |    |    |    |    |    | 1  |
| Restless     |    |    |    |    |    |    |    |    |    |    |    |    | 1  |
| <b>Total</b> | 18 | 13 | 51 | 18 | 32 | 50 | 12 | 16 | 45 | 10 | 10 | 16 | 26 |
